# 1 Cell fate-decision as high-dimensional critical state transition

2  
3 Mitra Mojtahedi<sup># 1,2</sup>, Alexander Skupin<sup># 2,3</sup>, Joseph Zhou<sup>2</sup>, Ivan G. Castaño<sup>1,5</sup>,  
4 Rebecca Y. Y. Leong-Quong<sup>1</sup>, Hannah Chang<sup>4</sup>, Alessandro Giuliani<sup>6</sup> and Sui  
5 Huang\*<sup>1,2</sup>

## 6 7 Affiliation:

8 <sup>1</sup> Department of Biological Sciences, University of Calgary, 2500 University Dr. NW, Calgary, AB T2N  
9 1N4, Canada

10 <sup>2</sup> Institute for Systems Biology, 401 Terry Ave N, Seattle, WA 98109, USA

11 <sup>3</sup> Luxembourg Centre for Systems Biomedicine, 7, Avenue des Hauts-Fourneaux L-4362 Esch-sur Alzette,  
12 Luxembourg

13 <sup>4</sup> 5AM Ventures, 2200 Sand Hill Road, Suit 110, Menlo Park, CA 94025

14 <sup>5</sup> Corporación Parque Explora, departament of innovation and design, Colombia

15 <sup>6</sup> Istituto Superiore di Sanità, Roma, Italy

16 \*email address: [sui.huang@systemsbiology.org](mailto:sui.huang@systemsbiology.org)

17 # equal contribution

## 18 19 20 Abstract

21 Cell fate choice and commitment of multipotent progenitor cells to a differentiated  
22 lineage requires broad changes of their gene expression profile. However, how  
23 progenitor cells overcome the stability of their robust gene expression configuration  
24 (attractor) and exit their state remains elusive. Here we show that commitment of  
25 blood progenitor cells to the erythroid or the myeloid lineage is preceded by the  
26 destabilization of their high-dimensional attractor state and that cells undergo a  
27 critical state transition. Single-cell resolution analysis of gene expression in  
28 populations of differentiating cells affords a new quantitative index for predicting  
29 critical transitions in a high-dimensional state space: decrease of correlation  
30 between cells with concomitant increase of correlation between genes as cells  
31 approach a tipping point. The detection of “rebellious cells” which enter the fate  
32 opposite to the one intended corroborates the model of preceding destabilization of  
33 the progenitor state. Thus, “early-warning signals” associated with critical  
34 transitions can be detected in statistical ensembles of high-dimensional systems,  
35 offering a formal tool for analyzing single-cell’s molecular profiles that goes beyond  
36 computational pattern recognition but is based on dynamical systems theory and  
37 can predict impending major shifts in cell populations in development and disease.

## 38 39 Introduction

40 A multipotent stem cell or progenitor cell is in a state that poises it to commit to one of  
41 two or more predestined lineages and to differentiate. Yet, its state-characteristic gene  
42 expression profile in the high-dimensional gene expression state space is robustly  
43 maintained because the cell is in a stable attractor state [1,2] (“ground state” [3]) of the  
44 gene regulatory network (GRN). Thus, commitment to a lineage involves overcoming  
45 this stabilization as genes alter their expression in a coordinated manner to establish the  
46 new gene expression pattern that implements the new phenotype of the differentiated  
47 state (Fig 1). Individual cells can, due to noisy gene expression fluctuations, transiently  
48 approach the border of the attractor in one or several dimensions and thereby be  
49 transiently “primed” to exit the basin of attraction, and by chance or biased by external  
50 conditions, differentiate into one of the predestined lineage accessible to the respective  
51 multipotent progenitor [4,5,6,7]. However the fundamental question remains whether  
52 differentiating cells exit the progenitor attractor simply by harnessing rare chance  
53 configurations of expression of the appropriate regulatory proteins to “jump” into a new  
54 nearby stable attractor state [8,9,10,11] or instead, by undergoing a larger-scale  
55 destabilization of their (high-dimensional) gene expression state [12,13,14].

56

57 A cell fate choice and fate commitment driven by a destabilization of the progenitor  
58 attractor state until cells “spill out of it” would represent a critical state transition [15,16].  
59 Herein, a stable attractor state of a system is gradually destabilized due to a steady and  
60 monotonical change in one characteristic of its underlying control structure (a systems  
61 parameter) until the system suddenly transits a “tipping point” (bifurcation) at which the  
62 stable attractor state disappears and other attractors become accessible. The progenitor  
63 cells in that destabilized attractor would then move to the(se) new stable state(s) that  
64 represent the gene expression pattern of new cell phenotypes. This formal description  
65 would explain multi-potentiality and the quasi-irreversible lineage restriction beyond a  
66 “point of no-return” [14].

67

68 Critical transitions of a system (like a cell) can occur because of the presence of non-  
69 linear interactions between its underlying component parts (genes, proteins) that  
70 collectively produce multiple distinct potential behaviors (cell phenotypic states) and if  
71 the realizable range of the value of critical parameters that characterize these interactions  
72 encompass qualitatively distinct behavioral regimes. Even if specific details of the  
73 interactions and the identity of the critical parameter are not known, stochastic  
74 fluctuations or certain perturbations can expose a system’s approach towards a critical  
75 state transition. This is manifest as “early warning signals” and is essentially a  
76 consequence of the destabilization of an attractor state that precedes the bifurcation event.  
77 Early warning signals can be exploited to predict a qualitative system-wide shift in a

78 complex nonlinear system, as has been applied to material properties, ecosystems, social  
79 systems and disease states [15,16,17,18].

80

81 The principle of a bifurcation governing cell fate choice naturally unites the two  
82 classical models of binary cell fate decision of multipotent progenitor cells at  
83 developmental branch-point: the stochastic (intrinsic) and the deterministic (instructive)  
84 models [19,20,21,22,23]. In the stochastic model [24,25] the cells randomly assume a  
85 (pre)committed, or primed state that renders them responsive to the fate-specifying  
86 growth factor which then acts to selectively expand (“select”) these primed cells which in  
87 turn would proliferate and terminally differentiate. In the deterministic model [26,27],  
88 the same factors act to specifically instruct the cell which gene to turn on and off to  
89 establish the gene expression pattern of the prospective fate. These two models are not  
90 mutually exclusive and experimental evidence support either scheme depending on  
91 experimental design [19,20,21,22,23].

92

93 Here we use single-cell gene expression analysis to examine in a model system the  
94 fate commitment of blood progenitor cells either into the erythroid cells (precursors of  
95 erythrocytes), promoted by the growth factor (cytokine) erythropoietin (EPO), or into the  
96 myeloid lineage (precursors of monocytes and granulocytes), promoted by the cytokines  
97 GM-CSF and IL-3. We show that the formalism of critical state transitions, so far only  
98 demonstrated for examples in which the system state is characterized by one variable  
99 [17], can (i) be applied to a high-dimensional system, namely the gene expression pattern  
100 defining a mammalian cell state, while (ii) at the same time, taking advantage of the fact  
101 that the system is present in an ensemble of replicates: a population of cells. To this end,  
102 we introduce a new index  $I_C$  computed from high-dimensional single-cell gene  
103 expression profiles of cell populations and show that it can serve as an early warning  
104 signal for an impending cell state transition. Critical transitions also explain the long-  
105 observed phenomenon of “rebellious cells” that differentiate into the direction opposite to  
106 that instructed by the growth factors. Single-cell resolution analysis of cells exposed to  
107 conflicting stimuli also confirm that developmental trajectories are robust and  
108 predestined, as predicted by early models [14,28], and that the stochastic and  
109 deterministic scheme of cell fate control coexist.

110

111

## 112 **Results and Discussion**

### 113 **1. Single-cell gene expression patterns during binary cell fate decision**

114 To determine if differentiation goes through a tipping point in high-dimensional gene  
115 expression state space we studied the commitment of the murine multipotent

116 hematopoietic precursor cell line EML into an erythroid and myeloid fate when  
117 stimulated by EPO and GM-CSF/IL-3, respectively [4]. We also treated cells with a  
118 combination of EPO and GM-CSF/IL-3 to separate a generic destabilization from the  
119 specific fate choice because we reasoned that the latter should be neutralized by the  
120 combination treatment. To ensure that heterogeneity of the starting cell population is due  
121 to dynamic fluctuations and not to pre-existing pre-committed cells (which would merely  
122 be selectively enriched by the respective growth factors) we used a cell line, as opposed  
123 to primary cells, that allows for the study of populations recently derived from a single  
124 common ancestor. We monitored transcript expression patterns at single-cell resolution  
125 using qPCR to harness the information provided by a statistical ensemble of (randomly  
126 distinct) cells which manifests the stability of a given nominal cell state.

127 Exit from the progenitor state was first monitored by flow cytometry measurement of  
128 the down-regulation of the stem-cell markers Sca1 and c-kit. The induction of a bimodal  
129 distribution with a new discrete subpopulation with lower Sca1 (as well as c-kit) surface  
130 protein expression confirmed the switch-like state transition (Fig 1A). Fig 1B shows the  
131 time course of single-cell transcript patterns of 19 selected genes (listed and explained in  
132 S1 Fig and S1 Table) known to be functionally involved in or to mark fate commitment  
133 of the EML cells, visualized by plotting each cell into the Cartesian space spanned by the  
134 three principal components (PC) following principal component analysis (PCA) to reduce  
135 the 19-dimensional state space (Appendix A Supplementary Methods). The “cloud” of  
136 untreated cells (black, depicted for reference for each time point) spreads upon treatment  
137 (colored balls), reaching highest diversity at day 3 (d3). The cells then coalesced into two  
138 distinct dense clusters at d6 (blue and red) representing the erythroid (red) and myeloid  
139 (blue) lineages which were identified by the characteristic expression of erythroid or  
140 myeloid transcript levels (S2 Fig and S1 Table). As shown in S3 Fig, in this single-cell  
141 qPCR, measurement noise was only a small fraction of the biological cell-to-cell  
142 variability, thus the dispersion of points in state space largely reflects the biological  
143 diversity of cells. Loading of gene scores show that PC1 captures the erythroid-myeloid  
144 dichotomy, whereas PC2 reflects the stemness-differentiation axis (S4 Fig). Single-cell  
145 measurement also provides the local cell density for each position in state space which  
146 can be visualized as the elevation of an approximate quasi-potential landscape [12] (Fig  
147 1C, legend) which shows the three attractor states as minima.

148 Intriguingly, at d3 some cells consistently went in the “wrong” direction, opposite to  
149 the instruction by the cytokines (e.g. some EPO-treated cells were associated with the  
150 myeloid cell cluster and vice versa). These “rebellious cells” disappeared at d6 – either  
151 by “transdifferentiating” to the “correct” lineage or by dying out (see below). Progenitor  
152 cells receiving a combined treatment also diverged at d3 but stayed in an intermediate  
153 “undecided” region of the state space before joining the myeloid cluster (Fig 1B). Thus,

154 the conflicting signals delayed the fate decision but ultimately a uniform decision is  
155 made. This behavior corroborates the notion that gene expression change during lineage  
156 determination is not simply instructed by external growth factors, but also governed by  
157 intrinsic constraints that channel cells towards predestined attractors of the GRN and do  
158 not allow for stable intermediates, as Waddington first predicted [28]. In this case it  
159 appears that the attractor for the myeloid fate is more readily accessible.

160

## 161 **2. High-dimensional critical state transition in ensemble of systems**

162 Independent of the (unknown) detailed dynamics of the underlying GRN, a  
163 destabilization and disappearance of even a high-dimensional attractor state is a  
164 bifurcation event and should display the signatures of an approach to a critical phase  
165 transition [16] at which cells would undergo a discontinuous switch towards the  
166 destination state. While the bimodal distributions of *Sca1* (Fig 1A) after d3 already  
167 suggest a quasi-discrete transition, they cannot reveal a destabilization in a high-  
168 dimensional state prior to the switch. Recently reported cases of critical transitions in  
169 stressed ecosystems and disease processes [refs. in [17]] pertain to low-dimensional  
170 systems in which typically one systems variable was observed longitudinally. By  
171 contrast, here we examine time snapshots of states of a high-dimensional system (19-  
172 dimensional cell state vector) embodied by the GRN.

173 From theoretical consideration, a critical destabilization and transition to a new  
174 attractor will be manifest in two changes in the correlation statistics (as explained and  
175 derived in S2 Appendix): First, a decrease of cell-cell correlation  $R(\text{cell } k, \text{ cell } l)$  between  
176 all pairs of the  $n$  cell state vectors in the  $m=17$ -dimensional gene space; this reflects the  
177 expected increase of amplitudes of random fluctuation of gene expression due to the  
178 weakening “attracting force” in the “flattening” basin of attraction prior to the bifurcation  
179 [29,30]. Second, a concomitant increase of gene-gene correlation  $R(\text{gene } i, \text{ gene } j)$   
180 between all pairs of “gene vectors” that describe the gene expression values of each gene  
181 across all the cells; this corresponds to the increase of long-range correlations of state  
182 variables in time and/or space described in many phenomenological analyses of critical  
183 state transitions [17]( 9)( 9). The overall increase in the correlation between the gene  
184 vectors arises because of the symmetry-breaking destabilization and is plausible from two  
185 different perspectives: (i) as a consequence of the “range restriction effect” of correlation  
186 in statistics when the dominance of the symmetric stochastic fluctuations in the attractor  
187 yields to non-symmetric, regulated change of gene expression [31,32] or (ii) as a  
188 consequence of the appearance of a saddle-node in the dynamical system description  
189 through which the individual cells pass. A detailed mathematical derivation of is  
190 provided in the S2 Appendix. This reasoning motivates an index for critical transitions,  
191  $I_C$ :

192 
$$I_C(t) = \frac{\langle |R(g_i, g_j)| \rangle}{\langle R(S^k, S^l) \rangle},$$

193

194 where  $g$  are gene vectors and  $S$  are the cell state vectors at sample time  $t$  and  $\langle R(\dots, \dots) \rangle$   
195 denotes the average of all Pearson's coefficients of correlation. We postulate that  $I_C$   
196 increases towards a maximum when cells go through the critical state transition (see S2  
197 Appendix). Recently, Chen et al. proposed a similar index for full transcriptome time  
198 courses which for lack of single-cell resolution state vectors estimates state  
199 diversification differently and involves the prior computational selection of a subset of  
200 genes in the same data [30].

201 Fig 2A shows the  $n \times n$  heat map for cell-cell correlation coefficients  $R(S^k, S^l)$  for  
202 all pairs of the  $n=1600$  cells for the three treatments (EPO, GM-CSF/IL-3 and combined)  
203 at each time point  $t$ . The diagonal shows that correlation of cells within the populations  
204 decreases at d1 and notably at d3, compared to d0, and increases again at d6, indicative of  
205 a transient diversification of cell states and a return to a more homogenous population  
206 consistent with an attractor state. Since we also recorded the cells' position with respect  
207 to the Sca1 surface marker expression (roughly partitioning the population into three  
208 fractions, Sca1-high ( $H$ ), Sca1-medium ( $M$ ) and Sca1-low ( $L$ ) – see Fig 1A) one can see  
209 that the decrease of correlation was not due to comparing cells across subpopulations in  
210 bimodal populations (Fig 1A). The higher correlation among the cells within the extreme-  
211 low Sca1 fraction ( $L'$ ) in both EPO and GM-CSF/IL-3 treatment is consistent with  
212 advanced commitment of cells which are enriched in the Sca1-low fraction towards the  
213 erythroid fate as previously reported [4]. By contrast, the high correlation among the  $H$   
214 cells at the end of EPO treatment reflects the “rebellious” cells that became myeloid  
215 under EPO treatment.

216 The second criterion for a critical state transition, the increase in gene-gene  
217 correlation  $\langle R(g_i, g_j) \rangle$ , between the genes is shown in Fig 2B. Both EPO and GM-  
218 CSF/IL-3 treatment resulted in almost a doubling of  $\langle R(g_i, g_j) \rangle$  at d3 which returned  
219 towards baseline at d6. The heat-maps of the raw data (Fig 2C) show that the increase of  
220  $\langle R(g_i, g_j) \rangle$  resulted from correlated (red) as well as negatively correlated gene pairs  
221 (blue) at d1, but more pronounced at d3. By contrast, genes were mostly uncorrelated in  
222 the progenitor state, consistent with the dominance of random fluctuations around the  
223 attractor state.

224 Together, the cell-cell and gene-gene correlation gave rise to a temporal course of  
225 the index  $I_C$  that sharply peaked at d3 after induction of either fate commitment, which  
226 thus marks the critical transition and coincides with lineage separation in state space (Fig  
227 1B).

228

### 229 **3. Alternative monitoring of myeloid commitment reveals rebellious cells**

230 To exclude that the gene-gene and cell-cell correlation behavior is an idiosyncrasy  
231 linked to monitoring the exit from the progenitor attractor along the direction of Sca1  
232 reduction, we also monitored and dissected differentiation along the axis of increase of  
233 the differentiation marker CD11b, a reliable indicator of myeloid differentiation (Fig 3A).  
234 Following GM-CSF/IL-3 treatment, CD11b surface expression first increased and then  
235 Sca1 decreased, from CD11b<sup>LOW</sup>/Sca1<sup>HIGH</sup> to CD11b<sup>HIGH</sup>/Sca1<sup>LOW</sup>. At d3, the time  
236 around which maximal destabilization was expected, the entire cell population split into  
237 three populations with respect to CD11b: Sca1<sup>HIGH</sup>/CD11b<sup>LOW</sup> (termed  $\alpha$ ),  
238 Sca1<sup>HIGH</sup>/CD11b<sup>HIGH</sup> ( $\beta$ ) and unexpectedly, Sca1<sup>LOW</sup>/CD11b<sup>VERY-LOW</sup> ( $\gamma$ ) (Fig 3A).  
239 Single-cell transcript analysis suggests that the  $\alpha$ -subpopulation corresponds to the  
240 destabilized but not yet fully committed cells because it displays highest cell-cell  
241 diversity and high correlation of the gene vectors (Fig 3B). The cells of subpopulation  $\beta$   
242 were most advanced toward the myeloid lineage (high expression of Gfi1, CEBP $\alpha$  and  
243 cJun transcripts) consistent with the high CD11b expression, whereas cells of  
244 subpopulation  $\gamma$  correspond to “rebellious” cells that moved in the opposite direction and  
245 displayed erythroid gene expression patterns, including a large number of EpoR positive  
246 cells, despite treatment with GM-CSF/IL-3 (S5A-D Fig). At d6 the  $\gamma$  population  
247 disappeared (Fig 3A), consistent with the rebellious cells in the PCA analysis of Fig 1B.  
248 However, addition of EPO to the culture medium rescued the  $\gamma$  cells (Fig 3C), and to a  
249 lesser extent, the  $\alpha$  but not the myeloid committed  $\beta$  cells.

250 This finding not only confirms that the rebellious  $\gamma$  cells have aberrantly moved  
251 towards the erythroid lineage despite myeloid instruction but also corroborates the notion  
252 of “cell selection” in fate control in which growth factors determine lineage also by  
253 acting as survival and mitogenic factors for early committed cells that express the  
254 cognate receptor – in this case the EpoR [19,23,24].

255

### 256 **4. Critical slowing down**

257 A dynamical signature of an approach to a critical transition that is often used in low  
258 dimensional systems is the “slowing down” of the relaxation of a state variable back to  
259 the original attractor state due to a reduced attracting force [15,17,18] after a small  
260 perturbation or noise-driven excursion. Although critical slowing down is linked to the  
261 flattening of the attractor and inherently associated with the increase in autocorrelation of  
262 the fluctuation of the state variables, and thus, not actually an independent criterion, its  
263 experimental assessment is distinct and often practical. Here critical slowing down was  
264 exposed by measuring the relaxation of sorted “outlier” cells which were (transiently) in  
265 an extreme state with respect to the projection into just one dimension, that of Sca1. We  
266 isolated the Sca1<sup>LOW</sup> tail of populations that were either treated for 1 day with GM-

267 CSF/IL-3 to destabilize the progenitor state, or in untreated populations. As previously  
268 shown, the Sca1<sup>LOW</sup> fraction re-establishes the parental distribution within 5-6 days [4].  
269 By contrast, cells exposed to GM-CSF/IL-3 for just one day which does not yet cause  
270 significant broadening of the distribution, required at least 9 days to reconstitute the  
271 parental Sca1 expression distribution from the same tail fraction (Fig 4).

272

## 273 **5. Transcriptomes confirm the scheme of rebellious cells**

274 Finally, the repeated observation of “rebellious cells” is consistent with a  
275 bifurcation at which two (or more) new attractors become accessible when the progenitor  
276 attractor vanishes, representing the dichotomy between the two “sister” lineages [13,33].  
277 The destabilization of the progenitor state, unlike in canonical saddle-node bifurcations of  
278 most studied critical transitions [15,16,17,18], opens up a choice of two attractors, and  
279 despite an instructive bias towards either one imposed by the growth factors, this allows  
280 cells to “spill” into the “wrong” attractor if molecular noise overcomes the instructive  
281 bias toward the intended lineage. Thus, the existence of “rebellious cells” is also a  
282 signature of a critical transition.

283 To show that such binary behavior is not an artifact of projection in one state space  
284 dimension (in this case, with respect to Sca1 or CD11b) but holds in the high-  
285 dimensional state space, we measured the transcriptomes of the subpopulations that have  
286 either responded to the growth factor or appeared to have not responded – at least with  
287 respect to change in Sca1 expression (Fig 5). As shown earlier (Fig 1) all three treatments  
288 with the either cytokines as well as combined, triggered a split of the population into two  
289 distinct subpopulations with response to the progenitor marker Sca1 (bimodal distribution  
290 at d3, Fig 5).

291 Intriguingly, cells from the Sca1<sup>HIGH</sup> subpopulation which appeared to have not  
292 responded after 3d in EPO because Sca1 stayed high (fraction #3 or H-Sca1 in Fig 5A)  
293 had a transcriptome that resembled that of the cells which had responded to GM-CSF/IL-  
294 3 treatment and had down-regulated Sca1 (fraction #8 or L-Sca1 in Fig 5A). Conversely,  
295 Sca1<sup>HIGH</sup> cells that had apparently not responded yet at d3 to GM-CSF/IL-3 (fraction #9  
296 in Fig 5A) displayed a more pronounced change of the transcriptome that was remarkably  
297 similar to that of Sca1<sup>LOW</sup> cells (fraction #2 that had responded to EPO). (For quantitative  
298 analysis of transcriptome similarities see S2 Table). In the combined treatment cells  
299 exhibited a transcriptome behavior that was similar to that of the nominally myeloid fated  
300 (GM-CSF/IL-3 treated) cells – in agreement with the single-cell transcript analysis (Fig  
301 1).

302 The transcriptome measurement of subpopulations which appear to have not  
303 responded to the differentiation signal with respect to down-regulating the progenitor  
304 state marker actually have responded but by changes in the non-observed state space



305 dimensions, underscoring the importance of high-dimensional dynamics. The crosswise  
306 overall similarity of the transcriptome changes in the non-responders in one treatment to  
307 that of the responders in the other treatment strongly supports the model of a constrained  
308 dynamics with a finite number (here: two) of fate options that represent the predestined  
309 developmental potentials embodied by attractors that become accessible once the  
310 progenitor state is destabilized. This behavior of aberrant but defined behavior also  
311 reveals a stochastic, non-instructive component in fate determination.

312 Specifically, we suspect that the rebellious cells are cells that following the  
313 flattening of the progenitor attractor initiated by the external differentiation signal  
314 erroneously enter the “non-intended” attractor that is also accessible because the  
315 stochastic gene expression fluctuations may, in some cells, overcome the instructive  
316 signal that bias the change toward a specific lineage attractor. Nevertheless the rebellious  
317 cells, being in the “wrong” fate, should eventually die because the lack of survival signals  
318 provided by the continuing presence of the same growth factor, as their disappearance in  
319 the measurement in Fig. 1 implies. Thus instruction and selection synergize, in a two-  
320 step scheme, in that cells must be instructed and be selected for in order to adopt a  
321 particular phenotype. This two-step process increases fidelity of fate determination in the  
322 tissue.

323

## 324 **6. Conclusion**

325 Here we show that exit from the multipotent progenitor state and commitment to a  
326 particular cell lineage exhibit signatures of a critical state transition because of the  
327 underlying destabilization of a high-dimensional attractor state. Fig 6 summarizes  
328 schematically the model. In doing so we confirm that the two classical models of cell fate  
329 control, instruction by extrinsic signals and selection of intrinsically predestined states  
330 [19,20,21,22,23], not only coexist but also complement each other within a formal  
331 concept.

332 The framework of a critical transition has been used to describe sudden qualitative  
333 changes in a variety of complex systems in nature [15,16,17,18] and entails the “early  
334 warning signals” that herald the transition. We show here that early warning signs which  
335 essentially manifest the distortion of the attractor landscape that is intrinsically linked to  
336 most types of bifurcations (“tipping point”) can also be defined and detected for high-  
337 dimensional dynamics.

338 To do so we introduce an index  $I_C$ , which is formally derived from dynamical  
339 systems theory [30] and whose increase serves as an early warning signal, indicating an  
340 approach to a bifurcation.  $I_C$  is particularly useful for single-cell resolution snapshots of  
341 molecular profiles, as provided by RNA-seq [34] and CyTOF [35], of statistical  
342 ensembles of cells (=cell populations) taken at multiple time intervals during a biological

343 time course. This quantity is derived from a dynamical systems theory treatment of the  
344 actual underlying process and not from descriptive statistical pattern recognition as  
345 currently used to analyze single-cell molecular profiles.  $I_C$  captures the information  
346 immanent in both the  $m$  gene vectors (the expression level of a gene across a large  
347 number  $n$  of individual cells) and the  $n$  cell vectors (the state of a given cell with respect  
348 to a large number of  $m$  genes), resulting in the data structure of a  $n \times m$  matrix for each  
349 time point in the process being studied. Thus,  $I_C$  does not require continuous monitoring  
350 as in many studies of critical state transitions because much of the information is in the  
351 high dimensionality ( $m$ ) and in the statistical ensemble ( $n$ ) and thus could be of practical  
352 utility for predicting major shifts in cell populations and tissues relevant in development  
353 and disease.

354

355

## 356 **Material and Methods**

### 357 *Culture and differentiation of EML cells*

358 Blood progenitor EML cells (ATCC CRL-11691) were cultured and maintained as  
359 described previously [24]. Multipotent EML cell population was stimulated with either  
360 EPO (to differentiate into erythroid cells), or GM-CSF/IL-3 and ATRA (to obtain  
361 myeloid cells) or a mixture of all cytokines for the “combined” treatment as previously  
362 reported [4,36]. Wright-Giemsa staining was performed with some modification  
363 following a reported protocol [37]. In brief, 60,000 cells in 250  $\mu$ l of PBS + 1% FBS  
364 buffer were cytopun at 350 rpm for 5 minutes per slide and allowed to air dry for 10  
365 minutes. Slides were subjected to five 1-second dips in methanol, followed by Wright-  
366 Giemsa staining solution (0.4% (w/v), Sigma). After a final rinse with water, slides were  
367 allowed to air dry for 30 minutes. Colored phase contrast images were obtained using a  
368 Zeiss Axiovert 200M microscope.

369

### 370 *Flow cytometry and fluorescent-activated cell sorting (FACS)*

371 Cell surface protein immunostaining and flow cytometry measurements were performed  
372 using established methods [4]. Briefly the antibodies Sca1-PE (BD Pharmingen  
373 #553335), ckit-FITC (BD Pharmingen #553355) and CD11b-FITC (BD Pharmingen  
374 #557396) were used at 1:1,000 dilutions in ice-cold PBS containing 1% fetal calf serum  
375 with (flow cytometry) or without (FACS) 0.01% NaN<sub>3</sub>. Appropriate unstained and  
376 single-color controls were used for gate definition and compensation set-up. Isotype  
377 control antibodies (BD Pharmingen #553988 for FITC and #553930 for PE isotype) were  
378 used to establish the background signal caused by non-specific antibody binding.  
379 Propidium iodide (Roche #11348639001) staining was used to identify dead cells that  
380 were removed from analyses. Flow cytometry analysis was performed on a BD

381 FACSCalibur cell cytometer with 10,000 viable events for each sample. Data were  
382 acquired using CellQuest Pro (BD) software and analyzed in FlowJo.  
383 For FACS sorting, the Sca1 protein distribution was measured and the expression  
384 distribution was gated into three regions according to the Sca1 expression level as Sca1-  
385 Low, Mid and High on day 0, 1 and 6 or 4 regions on day 3 after differentiation initiation  
386 (Fig 1A). Single cell sorting was conducted on a BD Biosciences FACS Aria III in lysis  
387 buffer (see below). For myeloid differentiation, cells were stained with antibodies for  
388 both Sca1 and CD11b protein markers and cell subpopulation were gated as illustrated in  
389 Fig 3A. For studies involving the dynamics of sorted subpopulations, antibodies were  
390 removed after sorting using brief incubation in a low-pH buffer [4].

391

### 392 ***Single-cell gene-expression analysis using OpenArray qPCR***

393 Single cells were directly sorted into 5.0  $\mu$ l of lysis buffer (CellsDirect kit, Invitrogen)  
394 containing 4.25  $\mu$ l Resuspension Buffer and 0.25  $\mu$ l Lysis Enhancer using a FACS Aria  
395 III (BD Biosciences). 0.5  $\mu$ l RNaseOut (Invitrogen) was added to the lysis solution to  
396 protect the RNA from degradation. To ensure that liquid droplets containing single cells  
397 were deposited at the center of the well and not at the wall, the position was checked on  
398 the plastic film covering the PCR plate. To reduce the possibility of cell sticking to the  
399 wall of the PCR well plate, we used low-binding PCR plates (Axygen, #6509). As control  
400 sample, a small population of 100 cells were sorted into a single well for qPCR analysis.  
401 To test for contamination of sorted cells with mRNA from lysed dead cells, 5.5  $\mu$ l liquid  
402 from the FACS instrument was collected and analyzed. After sorting, the samples were  
403 heated 75 °C for 10 min to accelerate the lysis process and samples were stored at -80 °C.  
404 From these single-cell lysate samples, cDNA was directly synthesized as described  
405 previously [36]. The obtained cDNA was pre-amplified by 18 cycles [36] and  
406 subsequently diluted with Tris-EDTA buffer at a ratio 1:10 resulting in templates for the  
407 real-time PCR analysis. This protocol led to less than 30 quantification cycles ( $C_q$ ) during  
408 the single-cell qPCR analysis on an OpenArray system (Life Technologies). On this  
409 system, each qPCR plate consists of 12 $\times$ 4 subarrays and each subarray contains 8 $\times$ 8  
410 reaction chambers of 33 nl volume [38] (S 6A Fig). Each sample was divided into a  
411 subarray with 64 reaction chambers prior qPCR quantification. No-template (water)  
412 control was also run on each plate to check for non-specific products and/or presence of  
413 contaminants in the master mix. Following the amplification, the corresponding curves  
414 and  $C_q$  values were processed using the OpenArray Real-Time qPCR Analysis software  
415 (version 1.0.4) with a quantification threshold of 100(+/-5). Specific PCR primers were  
416 pre-immobilized in the chambers (S 6B Fig) and released in the first cycle by heat. For  
417 each subarray, 2  $\mu$ l of target sample was loaded into each well of a 384-well plate  
418 (Applied Biosystems); subsequently, 3  $\mu$ l of the master mix reaction consisting of

419 TaqMan OpenArray Real-time PCR Master Mix (Applied Biosystems) was added to each  
420 well. Target and master mix were combined, centrifuged, and the 384-well plate was  
421 processed in the OpenArray AccuFill system (Applied Biosystems). During processing,  
422 2.1  $\mu$ l of the reaction solution was transferred automatically from each well into the  
423 corresponding subarrays of a qPCR plate, where the reaction solution retains into the  
424 reaction wells due to the differential hydrophilic–hydrophobic coating between wells and  
425 surface of the qPCR array [38]. The qPCR step was performed using thermocycling  
426 conditions of 50 °C for 2 min, 95 °C for 10 min, 40 cycles of 95 °C for 15 sec and 60 °C  
427 for 1 min.

428

#### 429 *Testing Taman qPCR assays*

430 We used off-the-shelf primers designed by Applied BioSystems (Life Technologies) for  
431 the analysis. The primers are usually designed to span exon-exon junction to target  
432 multiple splice variants of one transcript and to target only and specifically the gene of  
433 interest, avoiding amplification of genomic DNA. S3 Table lists all genes of interest, the  
434 inventoried TaqMan assay IDs (Applied Biosystems) and further relevant information  
435 where the manufacturer does not provide primer and probe sequences. To evaluate qPCR  
436 assay performance, calibration (standard) curves were generated by performing qPCR on  
437 a serial dilution of a prepared template. Each of these dilutions was dispensed into two  
438 subarrays of OpenArray plate leading to 6 technical qPCR replicates for each single cell  
439 sample. To minimize the effect of sampling errors on quantification precision, only  
440 sample/assay combinations with at least 3 quantifiable replicates were considered for  
441 preparing the standard curves. The GAPDH assay was not pre-immobilized on  
442 OpenArray plate but was independently tested on BioRad qPCR platform.

443

#### 444 *Analysis of single-cell gene expression data*

445 Data analysis is described in more details in Supplementary Discussion. Single-cell  
446 expression data were initially analysed with OpenArray qPCR analysis software. For  
447 quality control, amplification curves were quality filtered and Ct thresholds were set for  
448 each assay with the same thresholds used across all experiments and cell populations.  
449 Data were subsequently exported to Excel as csv files. All of Cq values are available in  
450 S1 Table. Samples not expressing any gene were excluded from the analysis.  
451 Experimentally determined LODs were used as cutoff Cqs (S3 Table). Each assay was  
452 performed in triplicates, and the median of the triplicates was used for subsequent  
453 analysis. After this pre-processing,  $\Delta$ Cq was calculated as previously described [39].  
454 Higher level of analysis such as correlation, clustering, and PCA was performed on log2-  
455 transformed expression data.

456

### 457 *Gene expression profiling with microarrays and data analysis*

458 Microarray analyses were performed by the Vancouver Prostate Cancer centre. EML  
459 progenitor cell population was stimulated with EPO alone, IL-3/GM-CSF alone or a  
460 combination of all cytokines. On d3 and d6 after stimulation with different cytokines, the  
461 main “peaks” in the Scal distribution were gated and cell subpopulations were sorted  
462 using FACSaria III. Fig 1A and B illustrate the experimental design for the microarray  
463 experiments. Total RNA was extracted from  $1 \times 10^6$  of sorted subpopulations using  
464 mirVana miRNA Isolation Kit (Ambion) following the manufacturer’s instructions.  
465 Genomic DNA was removed from the isolated and purified RNA using DNase I. Total  
466 RNA quality was assessed with the Agilent 2100 Bioanalyzer prior to microarray  
467 analysis. Samples with a RIN value equal to or greater than 8.0 were deemed acceptable  
468 for microarray analysis. Samples were prepared following Agilent’s One-Color  
469 Microarray-Based Gene Expression Analysis Low Input Quick Amp Labeling v6.0. An  
470 input of 100 ng of total RNA was used to generate Cyanine-3 labeled cRNA. Samples  
471 were hybridized on Agilent SurePrint G3 Mouse GE 8x60K Microarray (Design ID  
472 028005). Arrays were scanned with the Agilent DNA Microarray Scanner at a 3  $\mu$ m scan  
473 resolution, and data was processed with Agilent Feature Extraction 11.0.1.1. To filter out  
474 genes that were not expressed above the background noise, a raw intensity cutoff value of  
475 25 was applied because the correlation between the technical replicates decreases for  
476 higher levels. Green processed signal was quantile-normalized using the  
477 “normalize.quantiles” function in R that takes care of inter-chip variability. To filter out  
478 genes which did not change between the samples, the distribution of each gene across all  
479 samples was analyzed. Therefore the standard deviation (STD) distribution was  
480 calculated and only genes with  $STD > 10\%$  were selected. As a result, 6297 genes passed  
481 the criteria and were selected as the 10% top genes among the samples. Self-organising  
482 maps (SOM) of the 10% top most varied genes (6297 genes) were generated using the  
483 Gene Expression Dynamics Inspector program (GEDI) [40]. Cluster analysis was  
484 performed using the “clustergram” function in Matlab R2012a Bioinformatics toolbox  
485 using hierarchical clustering with Euclidean distance metric and average linkage to  
486 generate the dendrogram. Input data was log<sub>2</sub>-transformed values of normalized  
487 fluorescent intensity signals for genes of interest extracted from the samples and plotted  
488 as a heatmap. Data represented the average of  $n = 2$  independent biological replicates.  
489 The normalized fluorescent intensity values of 17 genes of interest in the curated network  
490 were extracted from each sample.

491

492

### 493 **Acknowledgments**

494 The authors would like to thank Drs. Luonan Chen and Hong Qian for helpful  
495 discussions.

496

497

### 498 **Author contributions**

499 M.M. designed experiments, performed experiments and data analysis. A.S. designed and  
500 performed statistical data analysis and theoretical analysis. J.Z. and A.G. performed  
501 theoretical analysis, R.L-Q and I.G.C. and H.C. performed experiments. S.H. conceived  
502 of experiments and theory and designed experiments and conceived and performed  
503 theoretical analysis. S.H. drafted the manuscript, M.M., A.S. and S.H. edited and wrote  
504 the paper.

505

506

### 507 **Additional information**

508 Accession codes: Microarray data have been deposited in GEO under accession number  
509 GSE70405.

510

511

### 512 **Figure legends**

513 **Fig 1. Single-cell analysis of transcript expression during binary fate decision in**  
514 **EML cells. (A)** A progenitor EML cell population was stimulated with EPO (left), IL-  
515 3/GM-CSF (right) or with a combination of EPO, GM-CSF/IL-3 (center). Flow  
516 cytometry histograms of Scal surface expression were gated into Scal<sup>LOW</sup> (L),  
517 Scal<sup>MEDIUM</sup> (M) and Scal<sup>HIGH</sup> (H) fractions or subpopulations (green boxes) during  
518 FACS sorting of single cells at the indicated days for use in later analysis (Fig 2). At d3,  
519 further division to account for the extreme outliers (L', H')\* indicates “rebellious cells”  
520 (see text). **(B)** For visualization of individual cells’ transcript expression patterns (of the  
521  $m=17$  genes) cells were projected onto a dimension-reduced state space spanned by the  
522 three first principal components (PC) following principal component analysis (PCA, see  
523 S1 Appendix). Each sphere represents a cell, colored according to treatment: untreated  
524 progenitors (grey); cells treated with EPO (red), cells treated with GM-CSF/IL-3 (blue);  
525 and combined-treated cells (purple). **(C)** To calculate a quasi-potential landscape for the  
526 three cell types, a Gaussian filter with  $s=2$  was applied to PC1 and PC2 coordinates of  
527 cells at d0 and d6 treated with EPO and GM-CSF/IL-3 leading to a smooth 2-  
528 dimensional distribution  $p$ . With the (quasi-)steady state assumption [15], the attractor  
529 landscape was visualized relative to a base level of 0 by  $-\log(p+1)$ .

530

531 **Fig 2. Critical transition during lineage commitment.** (A) Cell-cell correlation  
532 matrices displaying the Pearson correlation coefficient  $R(S^k, S^l)$  for all pairs of cells in  
533 states  $S^k$  and  $S^l$  (see S2 Appendix).  $R$  calculated for a set of 150 progenitor cells, 500  
534 EPO-treated, 500 GM-CSF/IL-3-treated and 450 combination-treated (COMB) cells from  
535 data used in Fig 1. Black squares (diagonal) emphasize the higher correlation between  
536 cells within the nominally same population. Two control genes (GAPDH and TBP) were  
537 excluded from this analysis. L', L, M, H, H' indicate the Sca1 fractions shown in Fig 1:  
538 extremely low, low, medium, high and extremely high level of Sca1 expression,  
539 respectively. (B) Average Pearson correlation coefficients for all cell-cell pairs (left) and  
540 all gene-gene pairs (center) as well as the state transition index  $I_c = \langle |R(g_i, g_j)| \rangle /$   
541  $\langle R(S^k, S^l) \rangle$  at various time points. Cell-cell correlation coefficients were calculated for  
542 the central fractions/subpopulations in panel A(\*). Error bars indicate SEM. (C) Gene-  
543 gene correlation matrices for the 17 genes of interest and the two endogenous control  
544 genes for the three treatments at various time points where correlation is indicated either  
545 by color (lower matrix triangle) or solid color segment in pie chart. Color values for  
546 magnitude of correlation coefficient for both matrices (A, C) are shown in color bar.

547

548 **Fig 3. Intermediate stage of myeloid commitment exhibits destabilization of**  
549 **progenitor state, alternative states and “slowing down” of relaxation.** (A) flow  
550 cytometry dot plot of expression of Sca1 and CD11b upon treatment of the progenitor  
551 EML cells with GM-CSF/IL-3. Three distinct subpopulations on d3, designated,  $\alpha$ ,  $\beta$  and  
552  $\gamma$ , in the (tri-modal distribution of CD11b flow cytometry histogram underneath (red line,  
553 treated; blue line, untreated). (B) Cell-cell correlation for 72 progenitor cells and 48 cells  
554 from each of the  $\alpha$ ,  $\beta$  and  $\gamma$  subpopulations, and gene-gene correlation for all 17 genes of  
555 interest and two endogenous control genes. Pearson correlation coefficient displayed as  
556 heatmap, same color scheme as in Fig 2. (C) Rescue by EPO of the “rebellious”  
557 =unintended  $\gamma$  subpopulation (pink curve) during myeloid differentiation. Three  
558 subpopulations ( $\alpha$ , dark blue;  $\beta$ , light blue and  $\gamma$ , pink) were FACS sorted, antibodies  
559 removed and stimulated with EPO. Total cell number and viability were quantified on  
560 day of sorting (d3) and 4 subsequent days. Viability was determined based on % of cells  
561 excluding trypan blue. Each point represents average +/- STD for 2 biological replicates.

562

563 **Fig 4. Critical Slowing down of state relaxation during fate commitment.** “Critical  
564 slowing down” of relaxation and restoring of parental distribution of the sorted Sca1-low  
565 outlier fraction in the treated population. Clonal EML progenitor cells were stimulated  
566 (top) with GM-CSF/IL-3 or not (bottom) and cells with lowest 15% Sca1 expression  
567 were FACS-sorted one day after stimulation.

568

569 **Fig 5. Whole-population transcriptome analysis reveals transient alternative**  
570 **program (“rebellious cells”).** (A) Sca1 expression population distribution in progenitor  
571 and cytokine-treated cells and transcriptomes of sorted subpopulations at indicated  
572 treatments/time points displayed as GEDI Self-organizing maps [40]. Progenitor EML  
573 cells were stimulated with EPO alone, with GM-CSF/IL-3 alone or with the combination  
574 of the two, and the Sca1-medium (M) fractions (d0 and d6) and/or the Sca1-Low and -  
575 High subpopulations (d3) were FACS sorted and used for microarray analysis. (B)  
576 Hierarchical cluster analysis of the microarray-based transcriptomes of the samples in A  
577 (columns, correspondence indicated by the green numbers) for a subset of the 17 genes  
578 analyzed in single-cell qPCR (rows).

579

580 **Fig 6. Epigenetic landscape model of symmetry-breaking bifurcation event.**  
581 Progenitor cells (grey-ish) stimulated with growth factors (e.g. ATRA/IL-3). This scheme  
582 illustrates the two stages of the model: starting with the treatment of progenitor attractor  
583 state, first, the destabilization of the (meta)stable attractor of the progenitor cells and  
584 generation of a poised unstable state and second, the opening of the access to the  
585 destination attractors (both intended and non-intended), allowing the cells to descend –  
586 further instructed by the cytokines to favor one of the two valleys. As explained in  
587 section 2 of results, the cell-cell and gene-gene correlation give rise to a gradual increase  
588 of the index IC that peaked at critical transition and coincides with lineage separation in  
589 state space.

590

591

## 592 **Supporting Information Captions**

593

594 **S1 Appendix. Supplementary methods (data analysis)**

595

596 **S2 Appendix. Supplementary discussion (with mathematical proof)**

597

598 **S1 Fig. Manually curated model of gene regulatory network governing fate decision**  
599 **of CMP.** Network of experimentally verified regulatory interactions of transcription  
600 factors involved in multipotency of the CMP state, fate decision and differentiation to the  
601 erythroid and myeloid lineages (S1 Table). The canonical GATA1-PU.1 circuit is  
602 highlighted in green. A few surface markers including c-kit (progenitor, grey box), EpoR  
603 (erythroid, red box) and CD11b (myeloid, blue box) were included in the network to  
604 control the cell differentiation behavior and used as markers for lineage commitment in  
605 experiments. The numbers point to the references listed in S1 Table.

606



607 **S2 Fig. Gene expression profile of single-cell samples during differentiation.**  
608 Expression profiles of 17 transcription factors and control genes (rows) in individual cells  
609 (columns) are visualized as a heatmap. Cell columns are arranged for days d1, d3 and d6  
610 with respect to different treatments where grey shades correspond to untreated  
611 progenitors (d0), red shades to EPO treatment, blue shades indicate cells treated with  
612 GM-CSF/IL-3 and purple shades to combined treatment EPO+GM-CSF/IL-3 cytokines.  
613 The different shades of each color indicate the different Sca1 marker expression levels  
614 Sca1<sup>Low</sup> (L), Sca1<sup>Mid</sup> (M) and Sca1<sup>High</sup> (H) determined during FACS sorting where darker  
615 shades denote higher Sca1 expression. Gene rows were ordered according to their  
616 biological role as indicated on the left.

617

618 **S3 Fig. Technical noise associated with single-cell RT-qPCR is significantly smaller**  
619 **than biological cell-cell variability. (A)** Quantification cycles (Cq) of 80 individual  
620 EML cells for GATA1 expression is reported. Values are means  $\pm$  STD for up to 128  
621 technical replicates. **(B)** Quantification cycles (Cq) of up to 110 technical replicates are  
622 presented for 3 selected single-cells. Single-cell Cqs of biological samples clearly show a  
623 broader distribution relative to that of technical replicates. **(C)** Box plots represent the  
624 variability in terms of CV for technical replicates averaged over 110 realizations of the  
625 real-time PCR-steps on the ds-cDNA and the distribution of CV across all 80 individual  
626 EML progenitor cells for the GATA1 expression. The biological variation was  
627 significantly larger than the technical noise (p-value 2.2e-28, Mann-Whitney U test).  
628 Similar results were obtained for PU.1 (not shown).

629

630 **S4 Fig. Distinct trajectories of cell differentiation are observed upon stimulation of**  
631 **progenitor cells with cytokines in the PCA state space. (A)** Principal component  
632 projections in a total of ~1600 haematopoietic cells including progenitor (black), single-  
633 EPO treated (red-shades), single-IL3/GM-CSF treated (blue-shades) and combined-  
634 treated (purple-shades) in the first three components determined from expression of all 17  
635 transcription factors and endogenous control genes. **(B)** Principal component loadings for  
636 PC 2 and 3 indicate the extent to which each gene contributes to the separation of cells  
637 along each component. **(C)** PCA weights of genes for the first three PCs reveals the  
638 importance of the individual genes to explain the difference between the different  
639 treatments and corresponding cell fate. **(D)** Cells in their attractor states still exhibit  
640 heterogeneous transcription profiles that can be traced back to individual genes. Cells  
641 treated with GM-CSF/IL-3 for 6 days are clearly located within the state space defined by  
642 the myeloid genes and cells treated by EPO exhibit 2 clusters where the lower one is  
643 governed by erythroid genes and the higher one by stemness genes. **(E)** Variance

644 explained by principal components show that the first three components jointly explain  
645 more than 70% of variation in the data.

646

647 **S5 Fig. Gene expression in individual cells from the progenitor population and the**  
648  **$\alpha$ ,  $\beta$ , and  $\gamma$  subpopulations. (A-D)** Heatmap representation of gene expression profiles  
649 for the set of 17 genes of the curated network and 2 endogenous genes as control in total  
650 216 single cells including 72 progenitor cells (panel A) and 48 single cells from each of  
651 the three subpopulations in the tri-modal Sca-1 population distribution on day 3 after  
652 GM-CSF/IL-3 treatment (Fig 3),  $\alpha$  (B)  $\beta$  (C), and  $\gamma$  (D). Genes are ordered according to  
653 their reported biological role, as erythroid-associated (red box), stemness (green box),  
654 myloid-associated (blue box) and endogenous genes in all subplots. Based on the  
655 expressed genes, the  $\beta$  subpopulation seems to be committed to the myeloid lineage while  
656 the  $\gamma$  subpopulation is committed to the erythroid lineage. The  $\alpha$  subpopulation exhibits an  
657 indeterminacy with a bias towards the myeloid lineage. **(E)** PCA of all attractor cells (d0  
658 and d6) as shown in the S4 Fig combined with the cells from the  $\alpha$  (yellow),  $\beta$  (green),  
659 and  $\gamma$  (pink) subpopulations support the above described similarity to the untreated EML,  
660 the GM-CSF/IL-3 stimulated and the EPO-stimulated cells, respectively. **(F)** Coefficient  
661 of variation CV (used as a cell-specific quantity to expose population dispersion) was  
662 calculated for each cell from the expression levels across all genes for each  
663 subpopulation. Histograms represent the number of cells at different level of the CV  
664 measure and show that cells in  $\alpha$  subpopulation have higher spread of cellular CV values.

665

666 **S6 Fig. Representation of an OpenArray plate used for single-cell qPCR. (A)** Each  
667 OpenArray (Applied Biosystems) is the size of a microscope slide. It holds 48 groups  
668 (subarrays, red rectangular) of 64 holes of 33 nl volume in which one PCR reaction  
669 occurs. A hydrophilic layer is at the interior surface of each hole and a hydrophobic layer  
670 is at the exterior surface of the plate allowing for filling the hole by surface tension. In  
671 total, each array carries 3072 qPCR reactions. **(B)** Specific PCR primers are pre-  
672 immobilized in individual holes (by manufacturer, for customized assay patterns) and  
673 released by heat in the first cycle. **(C)** An example of the distribution of single-cell  
674 samples (SC) along with NTC (no template water control), IRC (inter-run calibrator) and  
675 100-cell control (PC) samples on an OpenArray chip.

676

677 **S7 Fig. Quality control of single-cell qPCR. (A)** Inter-chip variability is evaluated using  
678 inter-run calibrator (IRC) sample. Each curve represents the distribution of Cq values of  
679 each gene across all OpenArray chips. The flat black curve represents the distribution of  
680 all genes across all chips. The inter-gene differences are up to 2 orders of magnitude  
681 larger than the inter-chip variability of the same gene. The inter-run calibrator was a 10-

682 fold diluted sample of 18 cycles pre-amplified cDNA of 10 ng isolated RNA from EML  
683 progenitor cell population. **(B-D)** Correlation between gene expression in an ensemble of  
684 48 individual cells and 6 replicates of 100-cell pools is plotted. Cells used were from  
685 subpopulations,  $\alpha$ ,  $\beta$  and  $\gamma$  (subplots b-d) as presented in Fig 3 and 19 genes as listed in  
686 Table S3 were measured in triplicate in all single cells and bulk (100-cell) samples from  
687 each subpopulation. Mean expression for each gene was calculated across all single cell  
688 or pool samples. Note that the scaled mean expression for 100-cells pool was plotted  
689 against mean expression for single-cells. In all cases a high correlation between single -  
690 cell data and bulk data with correlation coefficient of  $> 0.86$  was observed.

691

692 **S1 Table. Regulatory interactions in the curated GRN model of binary fate decision**  
693 **in CMP.** Table of the regulatory interactions (either activating (A) or inhibiting (I))  
694 between the genes. For each interaction, the literature is referenced. All interactions have  
695 been reported in for murine hematopoiesis.

696

697 **S2 Table. Quantified dissimilarity between transcriptomes from micro-arrays**  
698 between samples. Pair-wise dissimilarity between expression profiles (samples) was  
699 calculated based on the normalized gene expression levels for 6297 filtered genes (see  
700 METHODS) with  $1 - R$  where  $R$  is the Pearson's correlation coefficient which ranges  
701 from 0 to 1, meaning that 0 correspond to highest similarity and 1 to most different  
702 expression. Bootstrapping was performed by randomly selecting 30% of the genes in any  
703 sample to calculate the pair-wise dissimilarity metric and repeating the procedure 10,000  
704 times to generate the reported standard deviations.

705

706 **S3 Table. Evaluation of qPCR assays.** Table lists all primer pairs and relevant  
707 information including IDs and amplicon length. All assays were inventoried. Identical  
708 PCR primers were used in the pre-amplification step and the subsequent singleplex qPCR  
709 step. In addition, the amplification efficiency and limit of detection (LOD) of the qPCR  
710 assays are given. To evaluate efficiency and LOD, a 1:2 serial dilution was prepared from  
711 18 cycles pre-amplified product from 10 ng RNA purified from EML progenitor cell  
712 population. Amplification efficiency was calculated according to:  $[10(1/S)-1] \times 100\%$ .  
713 The slope was obtained by linear regression of the standards curve. Efficiency was  
714 determined as average of two biological replicates with 6 qPCR technical replicates each.  
715 The Cq value for the LOD is defined as the most diluted sample that results in positive  
716 amplification for 5 out of 6 replicates.

717

718 **S4 Table: Single-cell and 100-cell samples quantification cycles (raw) data.** The  
719 quantification cycles (Cqs) for all analyzed single-cells as well as 100-cell-pool control

720 samples are reported. Single cells from untreated EML control cells as well as EML cells  
721 treated with EPO, GM-CSF/IL-3 or a combination of all cytokines on d1, d3 and d6 of  
722 stimulation. Gene expression data for single-cell samples sorted from  $\alpha$ ,  $\beta$  and  $\gamma$   
723 subpopulations generated upon GM-CSF/IL-3 treatment of EML are also included. 6  
724 replicates of the 100-cell samples were also sorted from each fraction and/or  
725 subpopulation and analyzed as control.

726

727

## 728 **References**

- 729 1. Macarthur BD, Ma'ayan A, Lemischka IR. Systems biology of stem cell fate and  
730 cellular reprogramming. *Nat. Rev. Mol. Cell Biol.* 2009;10:672–81.
- 731 2. Huang S. Cell lineage determination in state space: a systems view brings  
732 flexibility to dogmatic canonical rules. *PLoS Biol.* 2010;8:e1000380.
- 733 3. Wray J, Kalkan T, Smith AG. The ground state of pluripotency. *Biochem. Soc.*  
734 *Trans.* 2010;38:1027–1032.
- 735 4. Chang HH, Hemberg M, Barahona M, Ingber DE, Huang S. Transcriptome-wide  
736 noise controls lineage choice in mammalian progenitor cells. *Nature.*  
737 2008;453:544–7.
- 738 5. Hough SR, Laslett AL, Grimmond SB, Kolle G, Pera MF, A continuum of cell  
739 states spans pluripotency and lineage commitment in human embryonic stem cells.  
740 *PLoS One.* 2009;4(11):e7708.
- 741 6. Pina C, Fugazza C, Tipping AJ, Brown J, Soneji S, Teles J, et al., Inferring rules  
742 of lineage commitment in haematopoiesis. *Nat. Cell Biol.* 2010;14:287–94.
- 743 7. Canham MA, Sharov AA, Ko MSH, Brickman JM. Functional heterogeneity of  
744 embryonic stem cells revealed through translational amplification of an early  
745 endodermal transcript. *PLoS Biol.* 2010;8:e1000379.
- 746 8. Kauffman S. Homeostasis and differentiation in random genetic control networks.  
747 *Nature.* 1969;224:177-8.
- 748 9. Wu M, Su RQ, Li X, Ellis T, Lai YC, Wang X. Engineering of regulated stochastic  
749 cell fate determination. *Proc Natl Acad Sci U S A.* 2013;110:10610-5.
- 750 10. Mendoza L, Alvarez-Buylla ER. Dynamics of the genetic regulatory network for  
751 *Arabidopsis thaliana* flower morphogenesis. *J Theor Biol.* 1998;193:307-19.

- 752 11. Huang S, Eichler G, Bar-Yam Y, Ingber DE. Cell fates as high-dimensional  
753 attractor states of a complex gene regulatory network. *Phys Rev Lett*.  
754 2005;94:128701.
- 755 12. Zhou JX, Aliyu MDS, Aurell E, Huang S. Quasi-potential landscape in complex  
756 multi-stable systems. *J. R. Soc. Interface*. 2015;12:1-15.
- 757 13. Zhou JX, Huang S. Understanding gene circuits at cell-fate branch points for  
758 rational cell reprogramming. *Trends Genet*. 2011;27:55-62.
- 759 14. Huang S. Systems biology of stem cells: three useful perspectives to help  
760 overcome the paradigm of linear pathways. *Philos Trans R Soc Lond B Biol Sci*.  
761 2011;366:2247-59.
- 762 15. Sole RV. *Phase Transitions*. Princeton, N.J.;Princeton University Press; 2011.
- 763 16. Scheffer M, Carpenter SR, Lenton TM, Bascompte J, Brock W, Dakos V, et al.,  
764 Anticipating critical transitions. *Science*. 2012;338:344–8.
- 765 17. Trefois C, Antony PM, Goncalves J, Skupin A, Balling R. Critical transitions in  
766 chronic disease: transferring concepts from ecology to systems medicine. *Curr*.  
767 *Opin. Biotechnol*. 2015;34:48–55.
- 768 18. Scheffer M, Bascompte J, Brock WA, Brovkin V, Carpenter SR, Dakos V, et al.  
769 Early-warning signals for critical transitions. *Nature*. 2009;461:53–9.
- 770 19. Coffman RL, Reiner SL. Instruction, selection, or tampering with the odds?  
771 *Science*. 1999 284:1283-1285.
- 772 20. Germain RN. T-cell development and the CD4-CD8 lineage decision. *Nat Rev*  
773 *Immunol*. 2002;2:309-22.
- 774 21. Robb L. Cytokine receptors and hematopoietic differentiation. *Oncogene*.  
775 2007;26:6715-23.
- 776 22. Graf T. Differentiation plasticity of hematopoietic cells. *Blood*. 2002;99:3089-101.
- 777 23. Enver T, Jacobsen SEW. Instructions writ in blood. *Nature*. 2009;461:183-184.
- 778 24. Enver T, Heyworth CM, Dexter TM. Do stem cells play dice? *Blood*.  
779 1998;92:358-41; discussion 352.

- 780 25. Davis CB, Killeen N, Crooks ME, Raulet D, Littman DR. Evidence for a  
781 stochastic mechanism in the differentiation of mature subsets of T lymphocytes.  
782 *Cell*. 1993;73:237-47.
- 783 26. Metcalf D. Lineage commitment and maturation in hematopoietic cells: the case  
784 for extrinsic regulation. *Blood*. 1998;92:345-7; discussion 352.
- 785 27. Rieger MA, Hoppe PS, Smejkal BM, Eitelhuber AC, Schroeder T. Hematopoietic  
786 cytokines can instruct lineage choice. *Science*. 2009;325:217-8.
- 787 28. Waddington CH. *Principles of Embryology*. Allen Unwin Ltd; New  
788 York:Macmillan; 1956.
- 789 29. Wang J, Xu L, Wang E, Huang S. The potential landscape of genetic circuits  
790 imposes the arrow of time in stem cell differentiation. *Biophys. J*. 2010;99:29–39.
- 791 30. Chen L, Liu R, Liu ZP, Li M, Aihara K. Detecting early-warning signals for  
792 sudden deterioration of complex diseases by dynamical network biomarkers. *Sci.*  
793 *Rep*. 2012;2:18–20.
- 794 31. Giuliani A. Statistical Mechanics of Gene Expression Networks□: Increasing  
795 Connectivity as a Response to Stressful Condition. *Adv. Syst. Biol*. 2014;3:1–4.
- 796 32. Gorban AN, Smirnova EV, Tyukina T. Correlations, risk and crisis: From  
797 physiology to finance. *Phys. A Stat. Mech. its Appl*. 2010;389:3193–3217.
- 798 33. Huang S, Guo YP, May G, Enver T. Bifurcation dynamics in lineage-commitment  
799 in bipotent progenitor cells. *Dev. Biol*. 2007;305: 695–713.
- 800 34. Bandura DR, Baranov VL, Ornatsky OI, Antonov A, Kinach R, Lou X, Pavlov S,  
801 Vorobiev S, Dick JE, Tanner SD. Mass Cytometry: technique for real time single  
802 cell multitarget immunoassay based on inductively coupled plasma time-of-flight  
803 mass spectrometry. *Anal. Chem*. 2009;81:6813–6822.
- 804 35. Ozsolak F, Milos PM. RNA sequencing: advances, challenges and opportunities.  
805 *Nature Reviews:Genetics*. 2011;12:87-98.
- 806 36. Mojtahedi M, Fouquier d’Hérouël A, Huang S. Direct elicitation of template  
807 concentration from quantification cycle (Cq) distributions in digital PCR. *Nucleic*  
808 *Acids Res*. 2014;42:e126.
- 809 37. Woronzoff-Dashkoff KK. The wright-giemsa stain. Secrets revealed. *Clin. Lab.*  
810 *Med*. 2002;22:15–23.

- 811 38. Branon C, Morrison T. Nanoliter high throughput quantitative PCR. *Nucleic Acids*  
812 *Res.* 2006;34:e123.
- 813 39. Fluidigm. Application Guidance□: Single-Cell Data Analysis-RevA1. 2012;1-40.
- 814 40. Guo Y, Eichler GS, Feng Y, Ingber DE, Huang S. Towards a holistic, yet gene-  
815 centered analysis of gene expression profiles: A case study of human lung cancers.  
816 *J. Biomed. Biotechnol.* 2006;29:1–11.

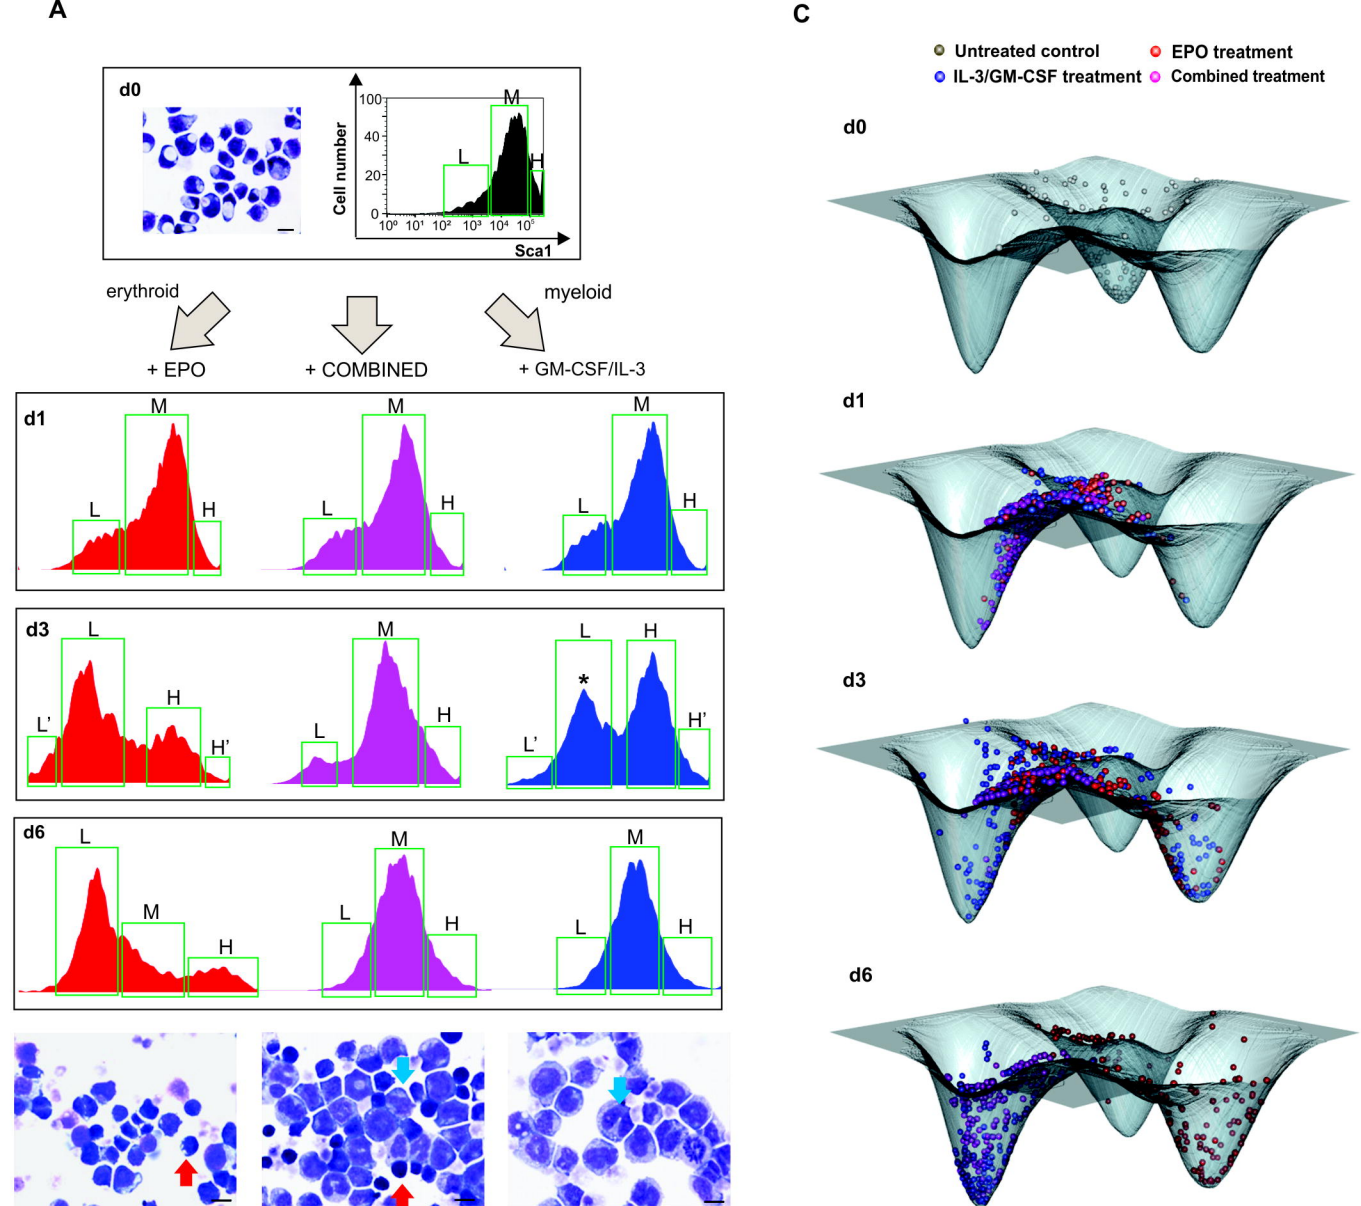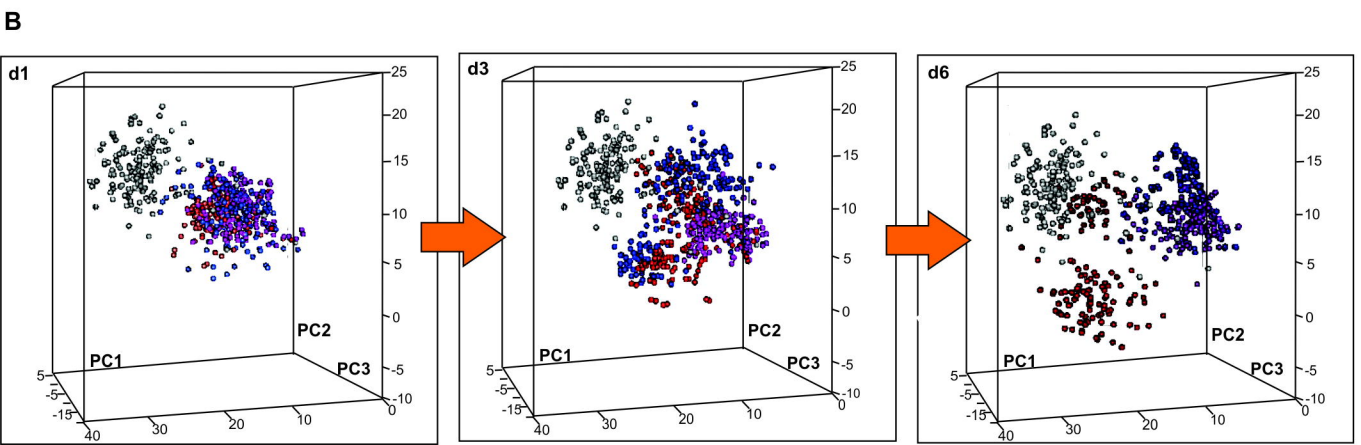





**A**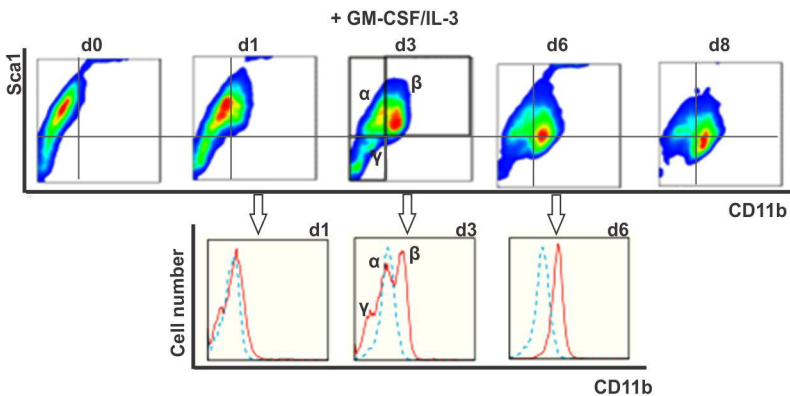**B**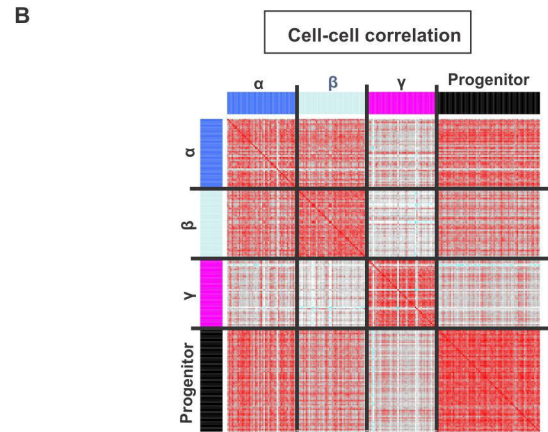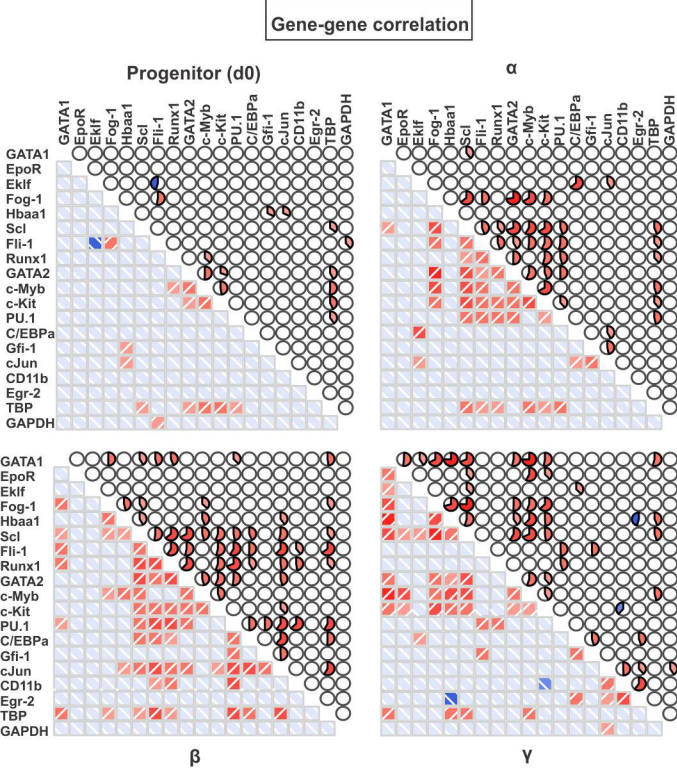**C**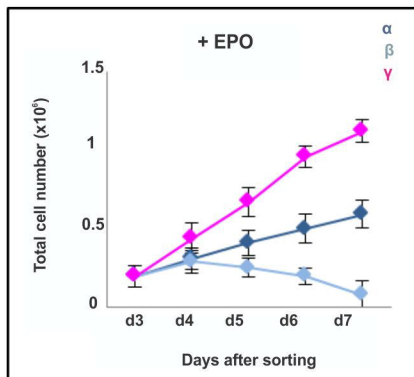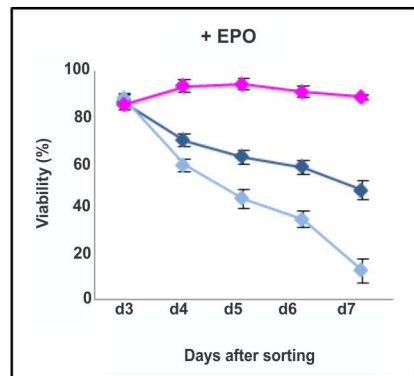

FACS sort and allow to relax

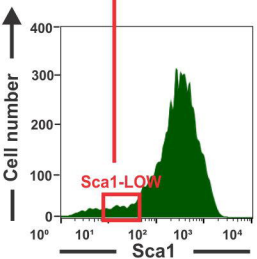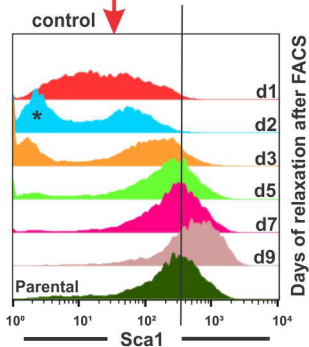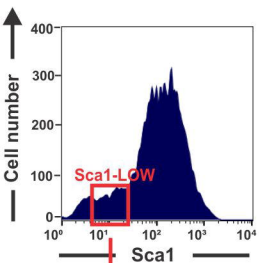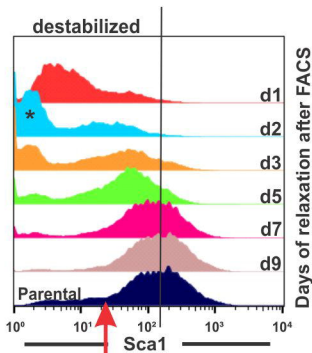

1 day in IL-3 before FACS  
sorting and relaxation

**A**

Time of cytokine treatment

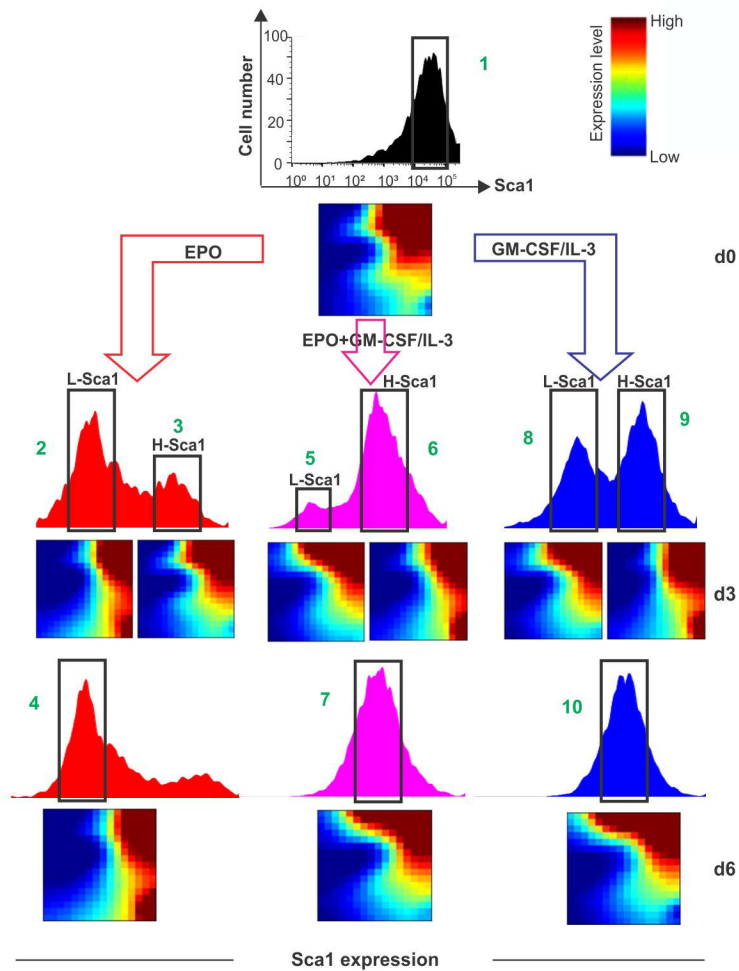**B**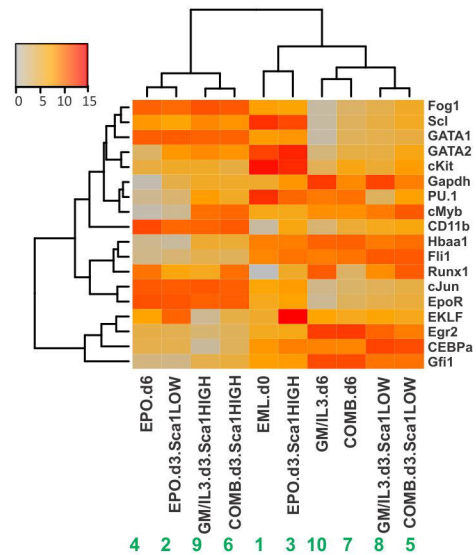

# Quasi-potential (“epigenetic”) landscape and critical transition (bifurcation)

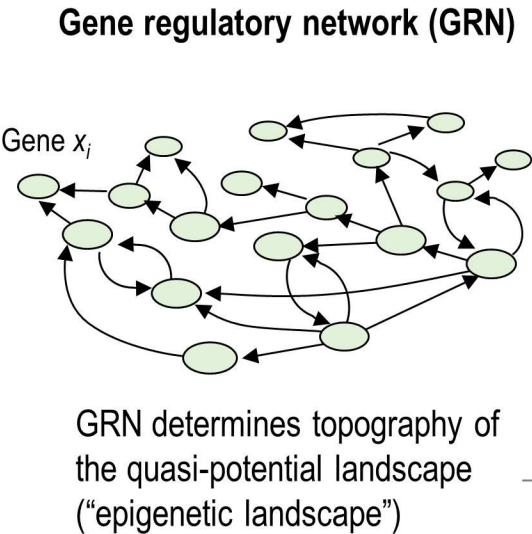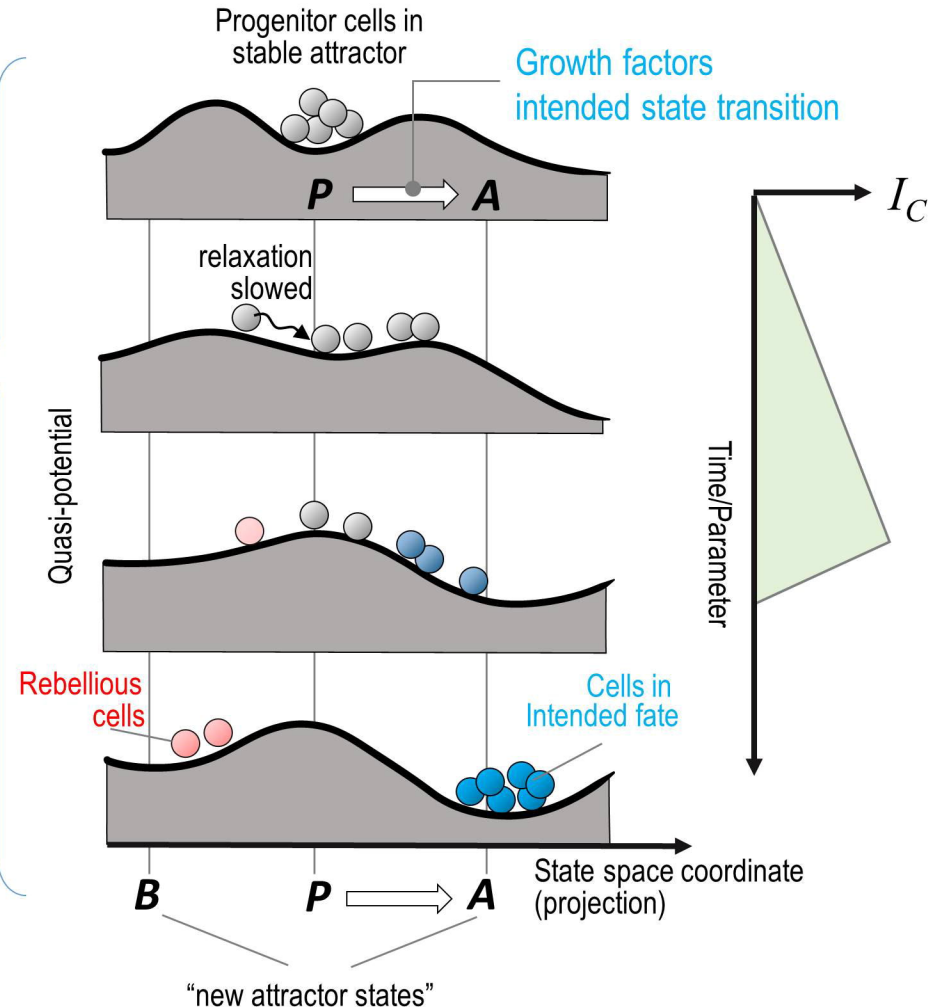

Source: http://biorxiv.org/content/10.1101/041541v2.full.pdf
